# Supplementary material for: Nanofibrillated cellulose surface grafting in ionic liquid
Source: Royal Society of Chemistry journal article supplement (doi:10.1039/c2sm25691f), 2012-01-01

## Supporting information

### O1S XPS data

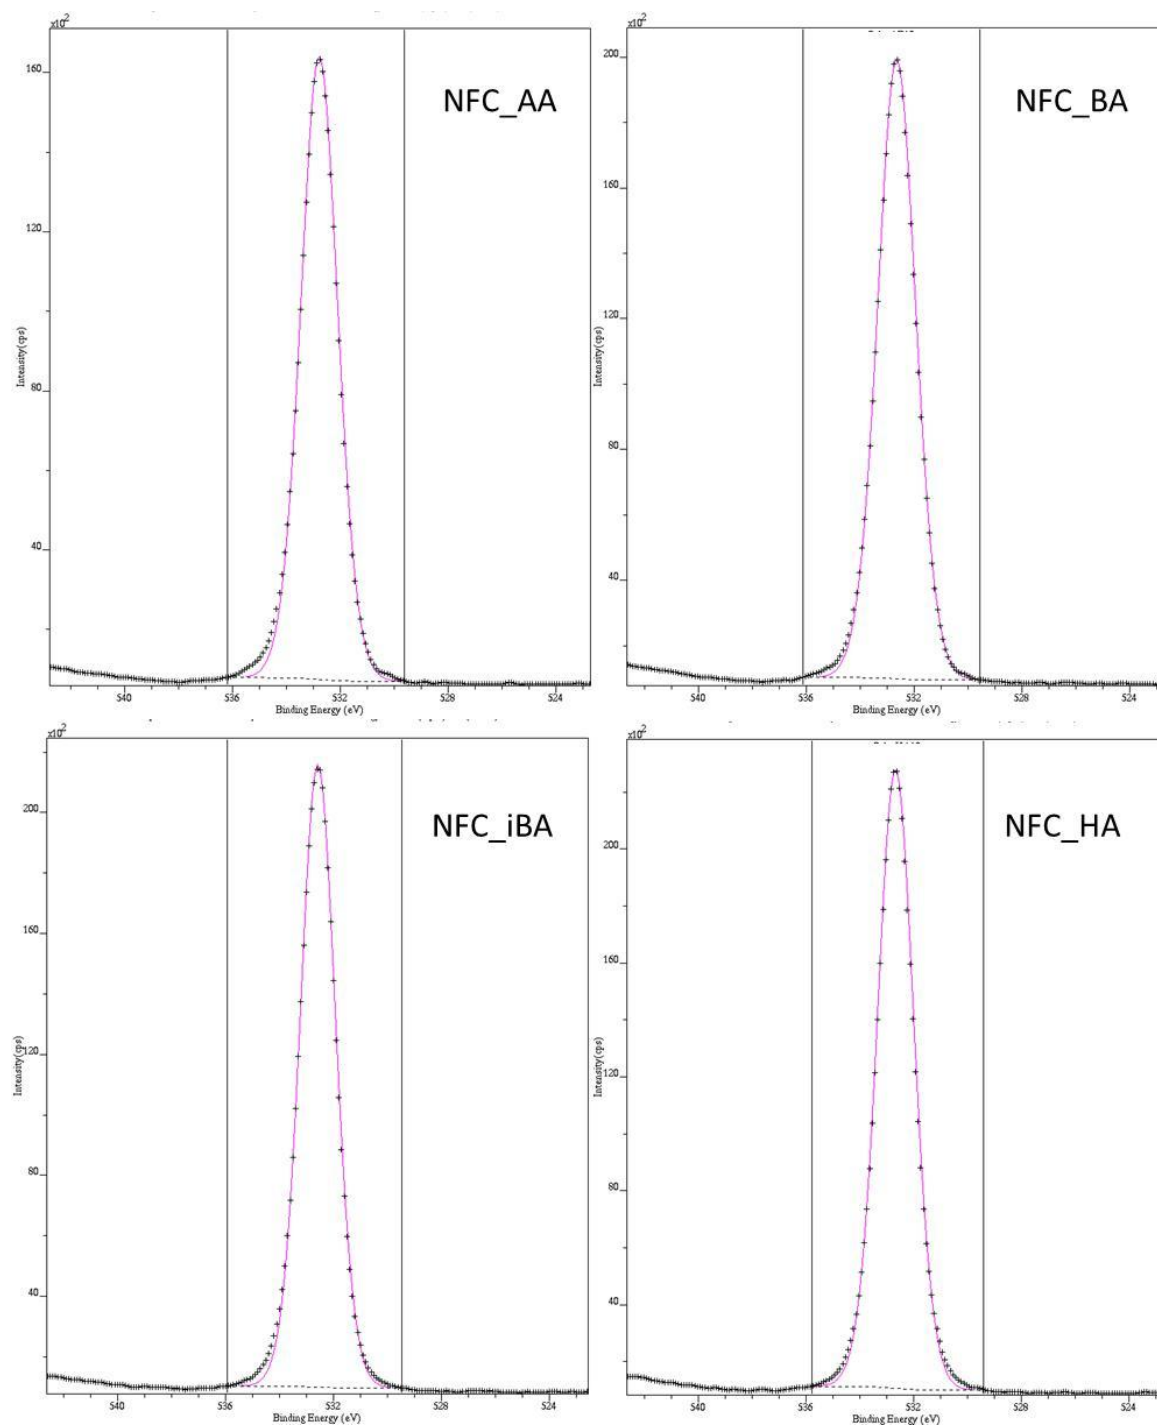

Full SIMS spectra and data (negative analyses)

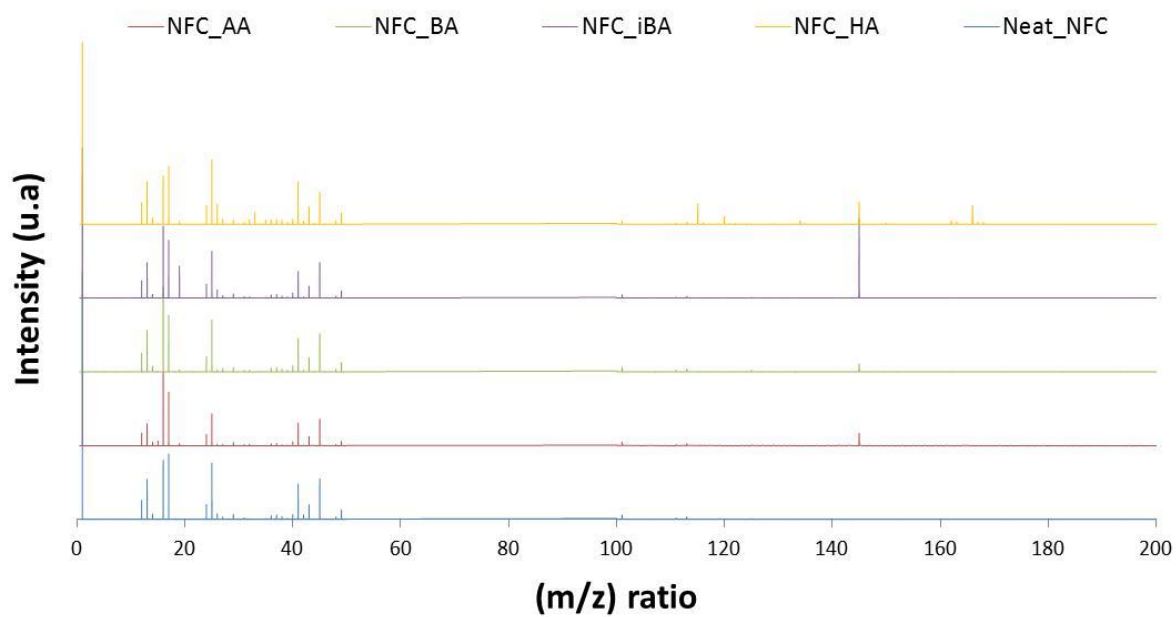

Full SIMS spectra and data (positive analyses)

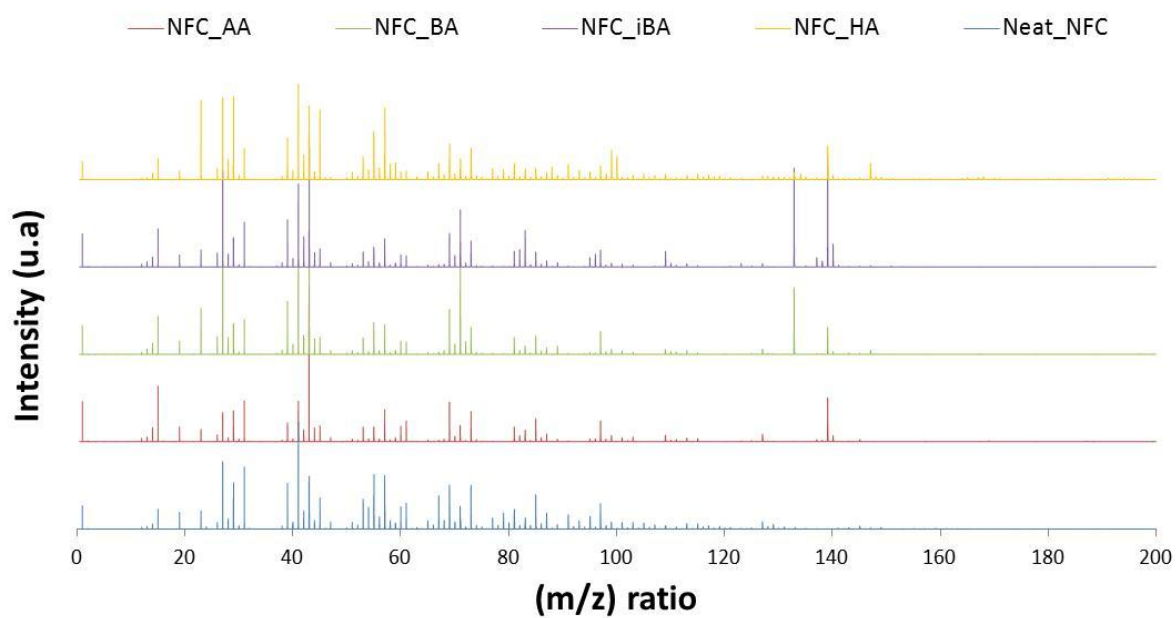

RMN expansion

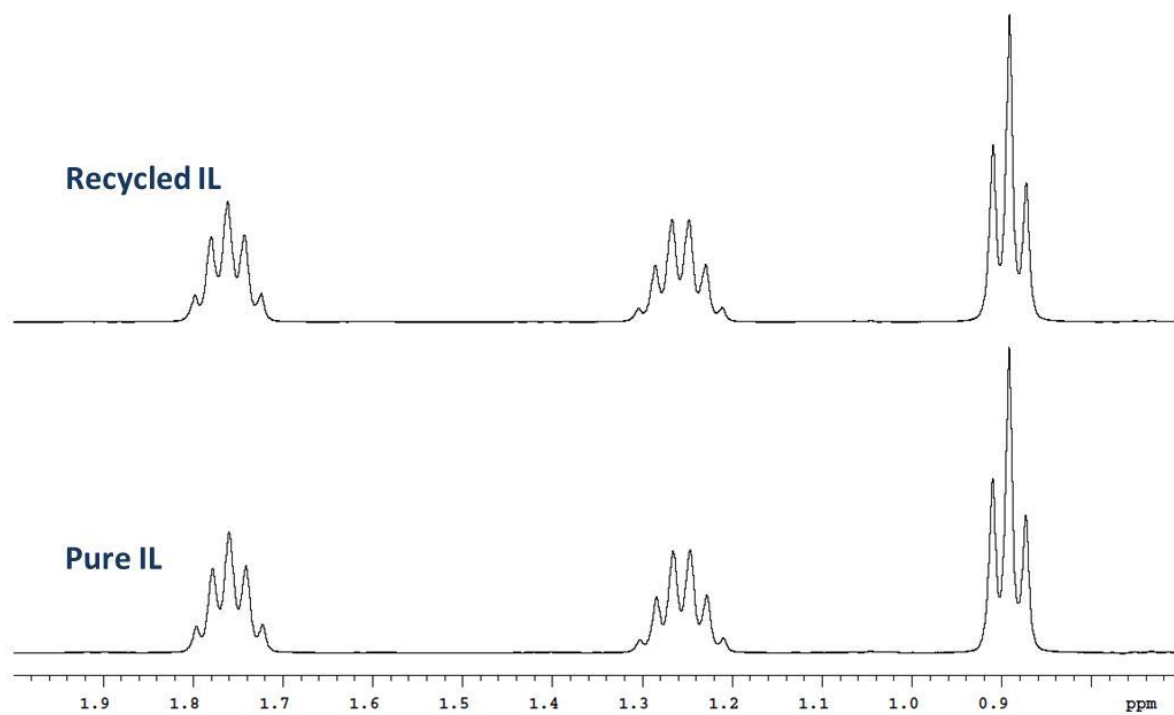

Supplement: c2sm25691f.pdf [file c2sm25691f.pdf]
